# Supplementary material for: The future of Upernavik Isstrøm through the ISMIP6 framework: sensitivity analysis and Bayesian calibration of ensemble prediction
Source: Copernicus journal article supplement (doi:10.5194/tc-18-5519-2024), 2024-11-28
Supplement: Supplementary file 1 [file tc-18-5519-2024-supplement.pdf]

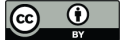

*Supplement of*

**The future of Upernavik Isstrøm through the ISMIP6 framework:  
sensitivity analysis and Bayesian calibration of ensemble prediction**

**Eliot Jager et al.**

*Correspondence to:* Eliot Jager ([eliot.jager@helsinki.fi](mailto:eliot.jager@helsinki.fi))

The copyright of individual parts of the supplement might differ from the article licence.

## S1 Additional plots on SSP and AOGCM influence

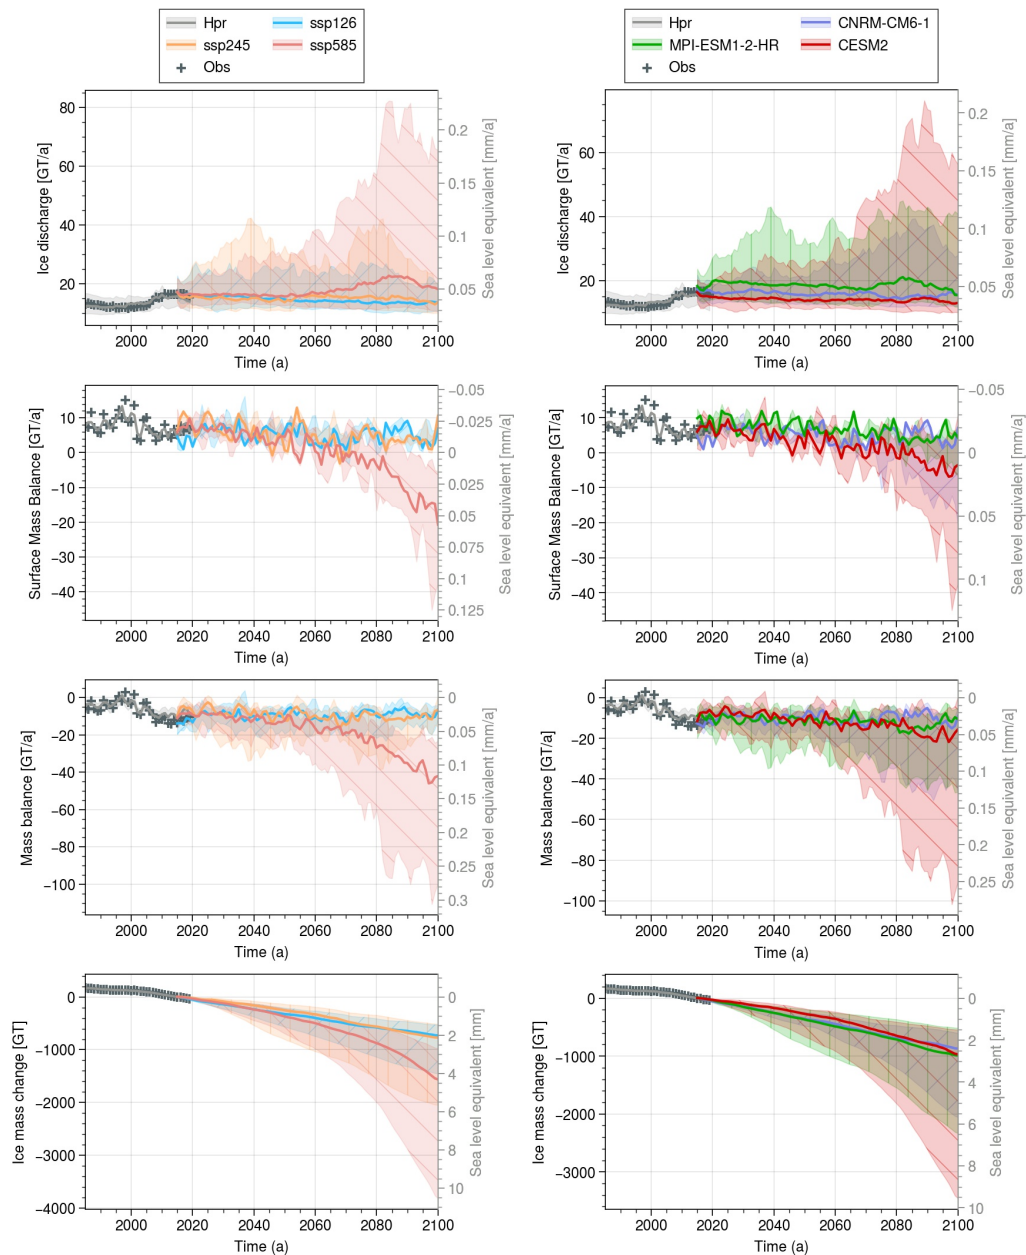

**Figure S1.** Left: UI ice discharge, SMB, Mass balance and Ice mass change over the period 1985-2100 for the hindcast ensemble (grey), the ssp126 members (blue with /), the ssp245 members (orange with /) and the ssp585 members (red with \). For each ensemble, the mean is represented in solid line and the shading include 95% of the ensemble members. Observation from Mouginot et al. (2019) of the 1985-2019 period are represented by +. Right: Same for members of CNRM-CM6-1 (purple with /), MPI-ESM1-2-HR (green with /) and CESM2 (dark red with \).

## S2 Weighting for each SSP

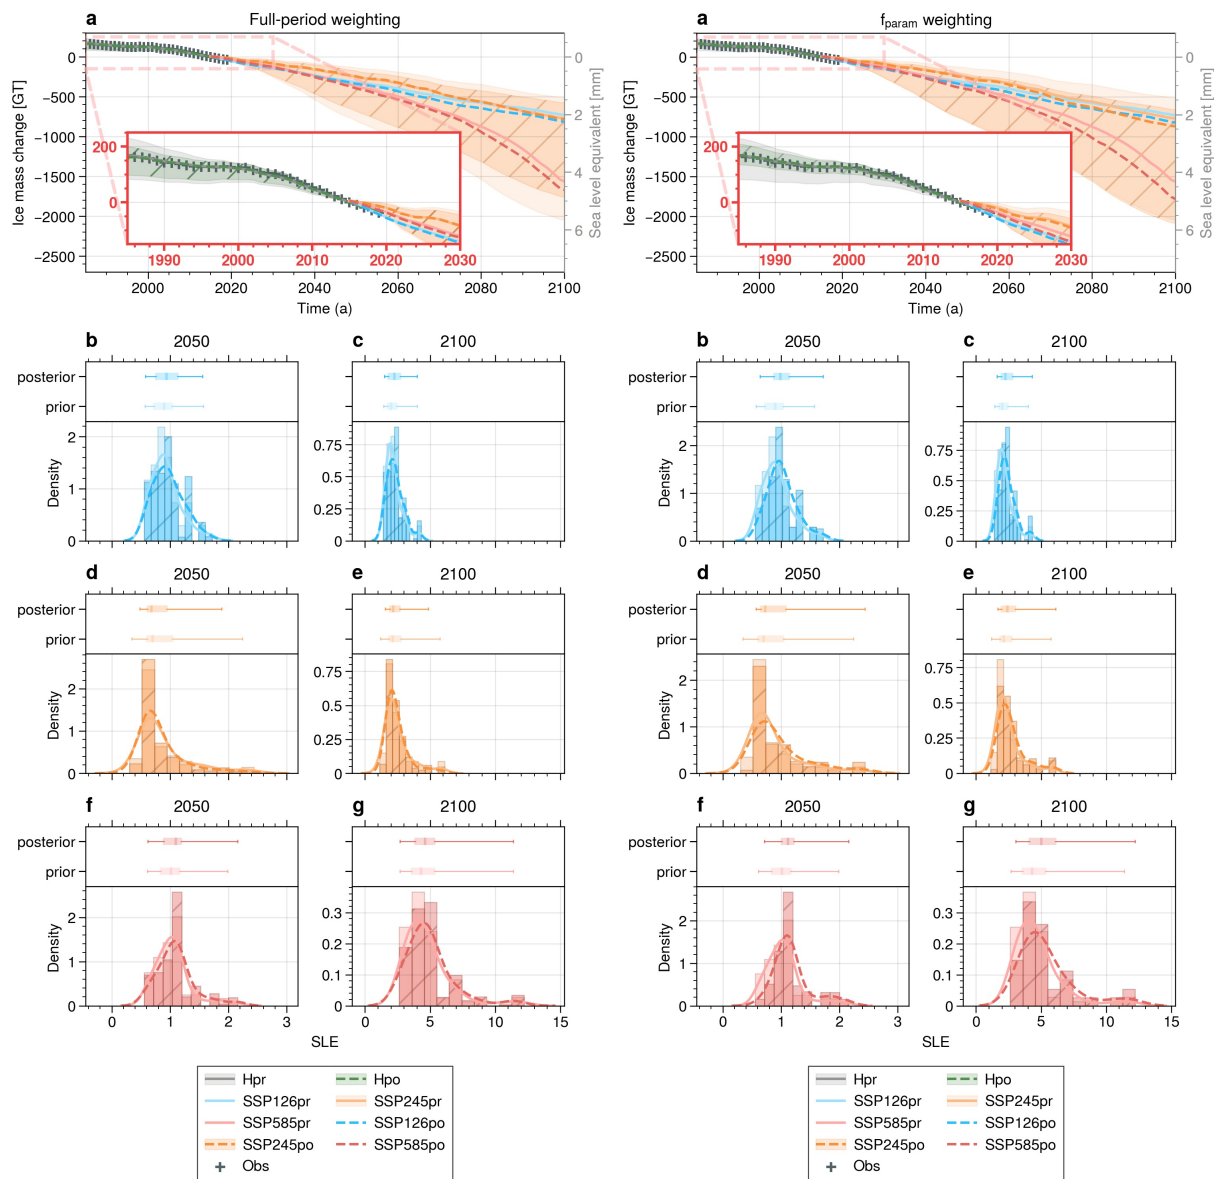

**Figure S2.** Evolution of UI ice mass loss over the period 1985-2100 for the Hindcast prior (grey), the Hindcast posterior (dark green with /), the SSP1-2.6 prior and posterior (blue), the SSP2-4.5 prior (light orange) and posterior (dark orange with /), and the SSP5-8.5 prior and posterior (red) ensemble simulations for the Full-period (left) and  $f_{param}$  (right) weighting. For each ensemble, the median is represented in solid (prior) or dotted (posterior) line and the shading include 95% of the ensemble members. Observation of the 1985-2019 period are represented by +. The red box shows a zoom to 1985-2030 period.

### S3 Additional metrics for Bayesian calibration analysis

#### S3.1 CRPS

|                | Cumulative ice discharge |       |       |       |       | Ice discharge |       |       |       |       | Surface elevation |        |        |        |        | Surface velocity |        |        |        |        |
|----------------|--------------------------|-------|-------|-------|-------|---------------|-------|-------|-------|-------|-------------------|--------|--------|--------|--------|------------------|--------|--------|--------|--------|
| <b>G_min</b>   | 3.962                    | 1.661 | 2.027 | 1.184 | 0.954 | 0.539         | 0.225 | 0.361 | 0.091 | 0.066 | 16.424            | 13.136 | 18.332 | 12.477 | 23.336 | 34.588           | 35.936 | 40.3   | 31.406 | 17.025 |
| <b>S_min</b>   | 3.889                    | 1.616 | 2.209 | 1.189 | 0.946 | 0.534         | 0.22  | 0.367 | 0.088 | 0.065 | 16.285            | 13.17  | 18.178 | 12.329 | 23.369 | 34.4             | 35.624 | 40.3   | 31.418 | 16.951 |
| <b>G_med</b>   | 3.895                    | 1.59  | 2.423 | 1.208 | 0.938 | 0.534         | 0.218 | 0.376 | 0.084 | 0.064 | 16.13             | 13.299 | 18.067 | 12.14  | 23.454 | 34.322           | 35.507 | 40.465 | 31.522 | 16.872 |
| <b>S_med</b>   | 3.893                    | 1.59  | 2.472 | 1.202 | 0.934 | 0.533         | 0.217 | 0.377 | 0.084 | 0.063 | 16.12             | 13.306 | 18.046 | 12.134 | 23.446 | 34.286           | 35.461 | 40.481 | 31.51  | 16.872 |
| <b>G_max</b>   | 4.393                    | 1.628 | 3.381 | 1.187 | 0.883 | 0.556         | 0.216 | 0.404 | 0.077 | 0.058 | 16.065            | 13.812 | 17.989 | 11.905 | 23.656 | 34.75            | 35.46  | 41.72  | 31.95  | 16.885 |
| <b>S_max</b>   | 4.26                     | 1.612 | 3.237 | 1.192 | 0.89  | 0.55          | 0.215 | 0.399 | 0.078 | 0.059 | 16.039            | 13.748 | 17.969 | 11.919 | 23.621 | 34.614           | 35.419 | 41.492 | 31.881 | 16.87  |
| <b>ZSxV</b>    | 3.898                    | 1.587 | 2.519 | 1.212 | 0.934 | 0.534         | 0.217 | 0.379 | 0.084 | 0.063 | 16.102            | 13.324 | 18.03  | 12.107 | 23.466 | 34.317           | 35.49  | 40.547 | 31.549 | 16.864 |
| <b>ZS</b>      | 4.336                    | 1.594 | 3.284 | 1.217 | 0.874 | 0.552         | 0.215 | 0.399 | 0.078 | 0.058 | 16.004            | 13.867 | 17.933 | 11.848 | 23.593 | 34.762           | 35.403 | 41.597 | 31.954 | 16.898 |
| <b>V</b>       | 4.004                    | 1.637 | 2.941 | 1.177 | 0.93  | 0.542         | 0.218 | 0.394 | 0.08  | 0.062 | 16.095            | 13.396 | 18.018 | 12.047 | 23.569 | 34.386           | 35.618 | 41.03  | 31.671 | 16.817 |
| <b>ID</b>      | 4.225                    | 1.487 | 4.414 | 1.294 | 0.865 | 0.542         | 0.211 | 0.43  | 0.081 | 0.057 | 16.492            | 14.4   | 18.555 | 11.87  | 23.943 | 35.63            | 35.42  | 43.918 | 32.9   | 17.18  |
| <b>CID</b>     | 3.276                    | 1.425 | 2.972 | 1.269 | 0.888 | 0.522         | 0.216 | 0.369 | 0.086 | 0.061 | 16.446            | 14.049 | 18.362 | 12.01  | 23.856 | 34.875           | 35.092 | 42.159 | 32.408 | 17.127 |
| <b>SP_mean</b> | 3.715                    | 1.624 | 1.968 | 1.174 | 0.955 | 0.533         | 0.224 | 0.348 | 0.092 | 0.066 | 16.417            | 13.159 | 18.254 | 12.462 | 23.384 | 34.583           | 35.835 | 40.189 | 31.604 | 17.041 |
| <b>SP_Q85</b>  | 3.607                    | 1.532 | 2.465 | 1.25  | 0.94  | 0.522         | 0.218 | 0.367 | 0.087 | 0.064 | 16.142            | 13.33  | 18.044 | 12.1   | 23.471 | 34.288           | 35.465 | 40.496 | 31.724 | 16.896 |
| <b>P100</b>    | 3.368                    | 1.305 | 2.302 | 1.318 | 0.817 | 0.499         | 0.216 | 0.316 | 0.088 | 0.057 | 16.217            | 14.105 | 18.027 | 11.946 | 23.439 | 35.184           | 35.421 | 41.558 | 33.021 | 17.238 |
| <b>P90</b>     | 3.573                    | 1.344 | 2.516 | 1.277 | 0.822 | 0.501         | 0.212 | 0.327 | 0.084 | 0.057 | 16.212            | 14.075 | 18.019 | 11.936 | 23.508 | 35.033           | 35.256 | 41.419 | 32.827 | 17.176 |
| <b>P80</b>     | 3.869                    | 1.406 | 2.806 | 1.238 | 0.828 | 0.511         | 0.211 | 0.343 | 0.081 | 0.056 | 16.22             | 14.058 | 18.031 | 11.932 | 23.581 | 35               | 35.205 | 41.493 | 32.656 | 17.121 |
|                | UI                       | UI-N  | UI-C  | UI-S  | UI-SS | UI            | UI-N  | UI-C  | UI-S  | UI-SS | UI                | UI-N   | UI-C   | UI-S   | UI-SS  | UI               | UI-N   | UI-C   | UI-S   | UI-SS  |
|                | zone                     |       |       |       |       | zone          |       |       |       |       | zone              |        |        |        |        | zone             |        |        |        |        |

Figure S3. Non-standardised CRPS table. Same legend as figure D1.

## 5 S3.2 MAE

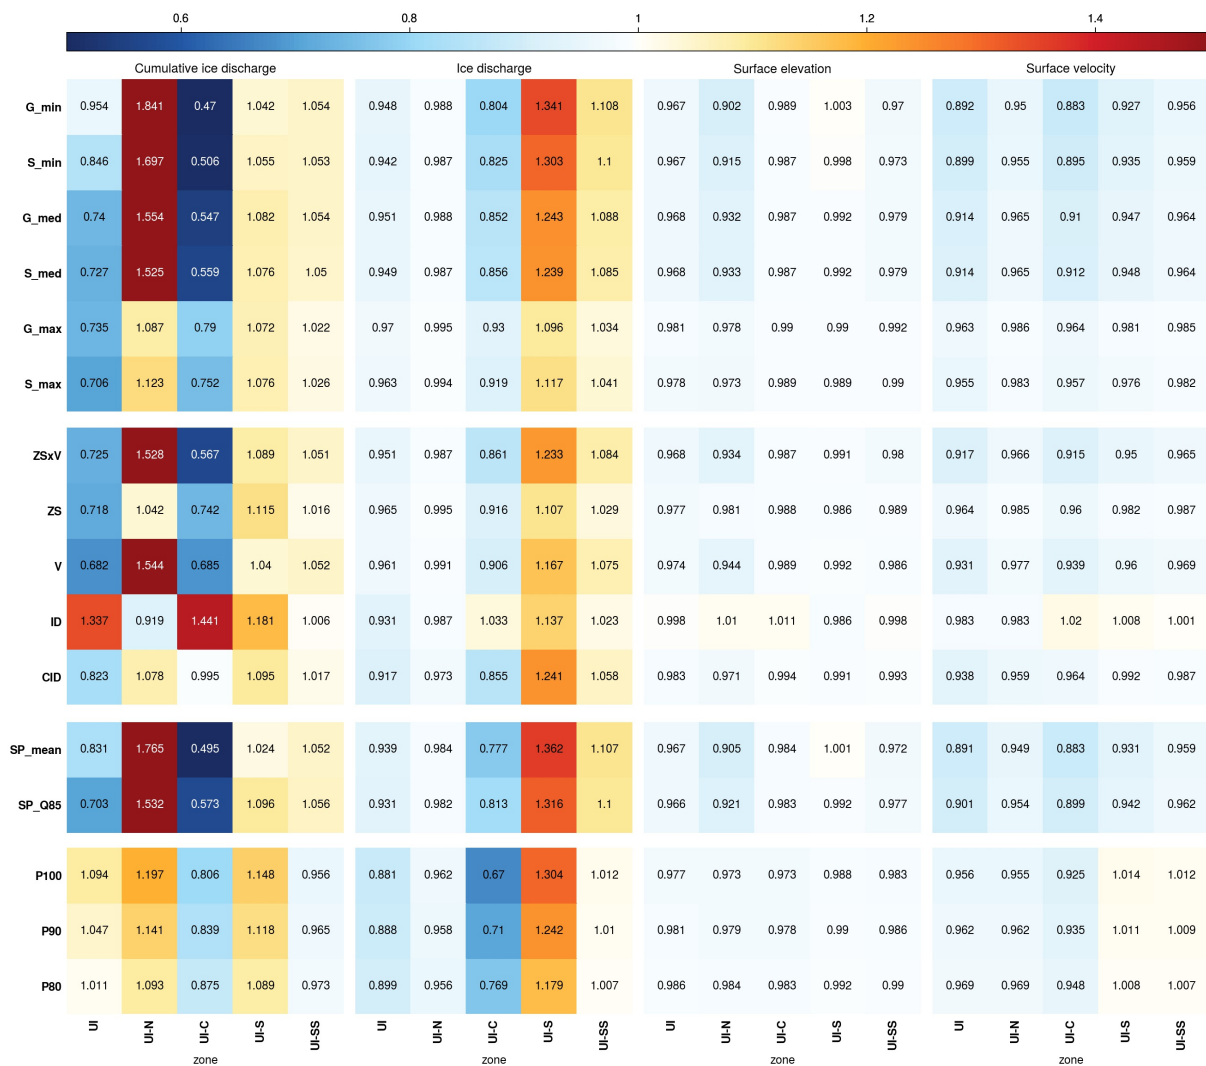

Figure S4. Standardised MAE table. Same legend as figure D1.

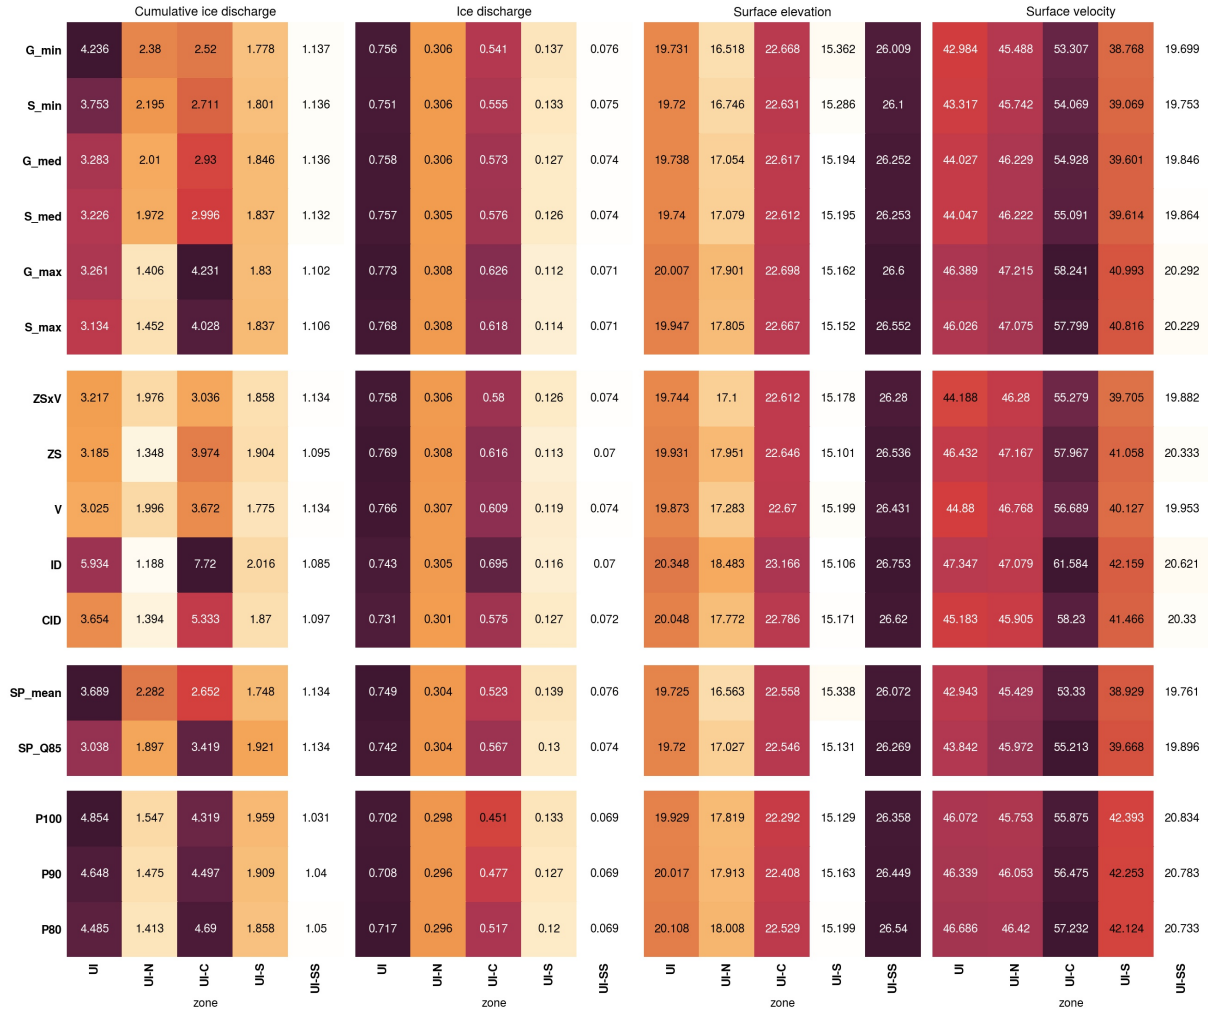

Figure S5. Non-Standardised MAE table. Same legend as figure D1.

### S3.3 STD

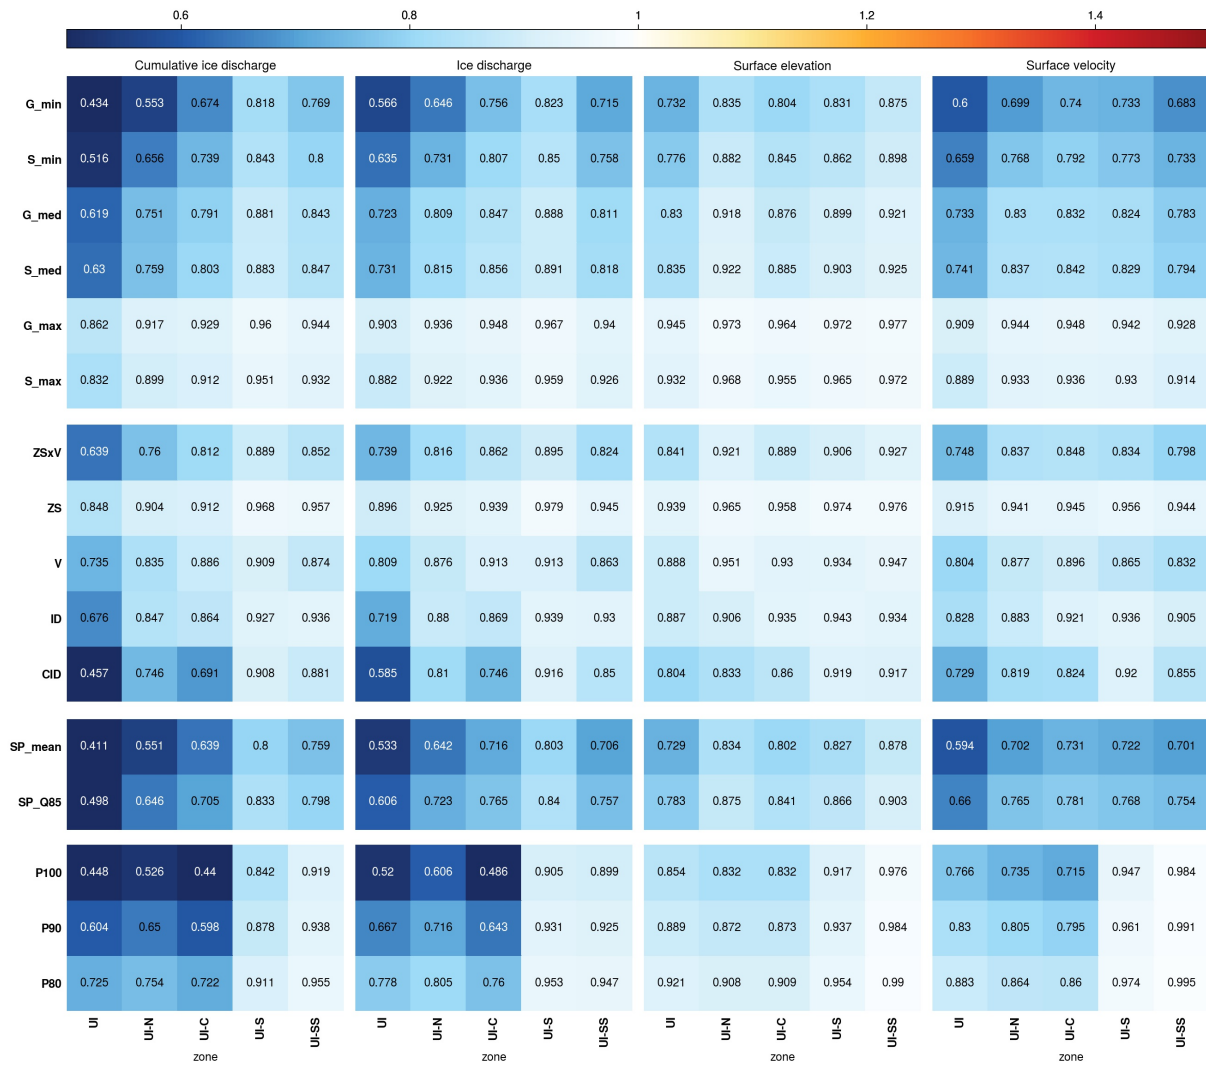

Figure S6. Standardised MAE table. Same legend as figure D1.

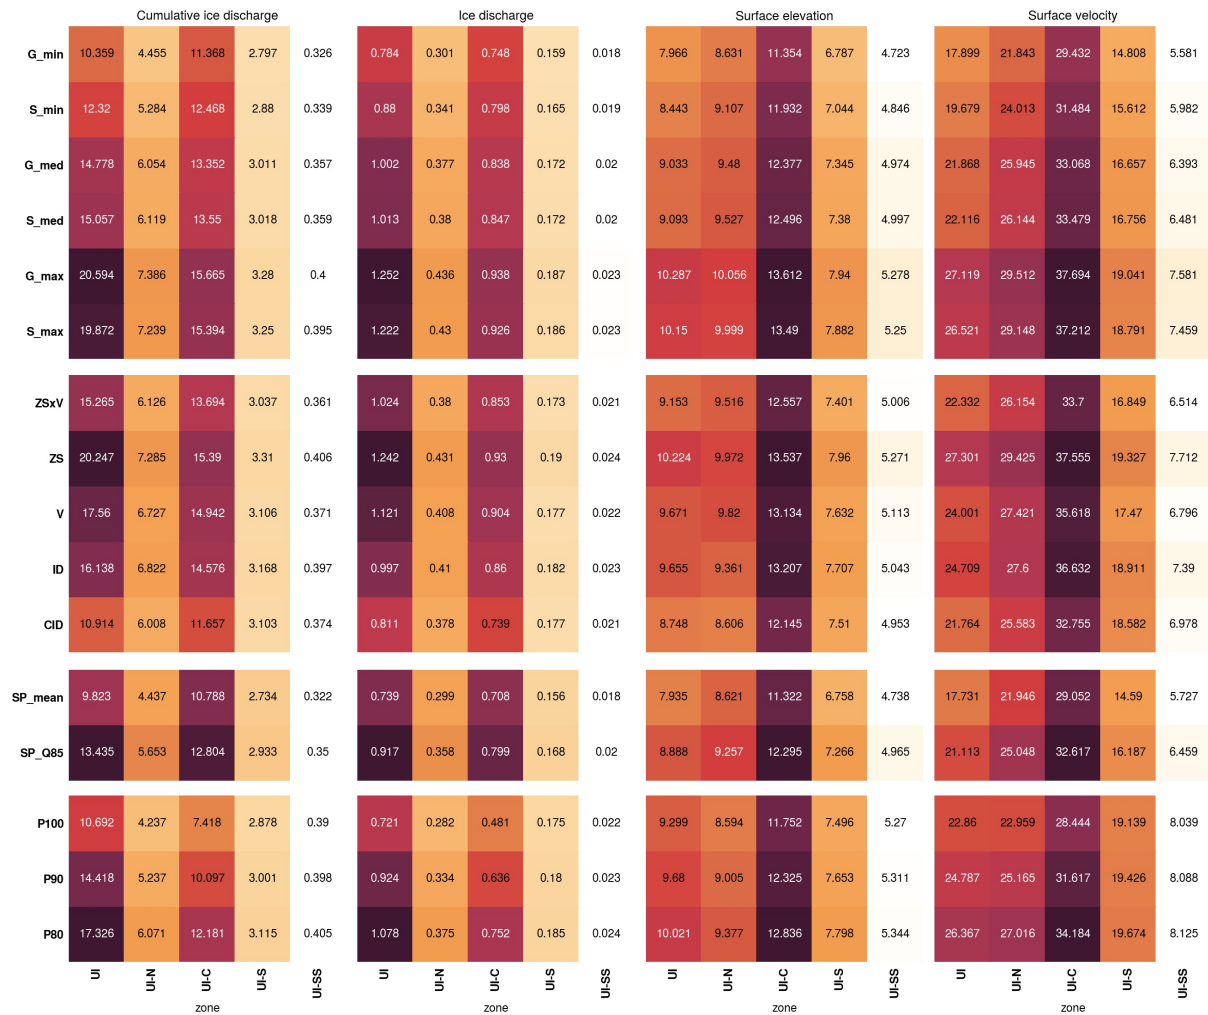

Figure S7. Non-Standardised MAE table. Same legend as figure D1.

## References

Mouginot, J., Rignot, E., Björk, A. A., van den Broeke, M., Millan, R., Morlighem, M., Noël, B., Scheuchl, B., and Wood, M.: Forty-six years of Greenland Ice Sheet mass balance from 1972 to 2018, *Proceedings of the National Academy of Sciences*, 116, 9239–9244, <https://doi.org/10.1073/pnas.1904242116>, 2019.
